# Supplementary material
Source: PubMed Central journal article supplement (PMC4186212)
Supplement: supp_czt075_czt075_Chinese.pdf [file supp_czt075_czt075_Chinese.pdf]

撒哈拉以南非洲国家艾滋病患病率性别不平等的背后：以肯尼亚、莱索托和坦桑尼亚为例

在撒哈拉以南的非洲，女性感染人类免疫缺陷病毒（HIV）和患艾滋病（AIDS）的风险要高于男性。要解释患病率性别不平等这一现象，区分导致这一现象的原因很重要，一种原因是由于 HIV 病毒的分布，男女接触到的风险不同，另一种是这些风险因素所带来的不同影响，亦或是这两种原因的综合。我们扩展了 Blinder-Oaxaca 分解法并用它来解释在肯尼亚、莱索托和坦桑尼亚这三个国家不同性别感染 HIV 病毒或艾滋病比例不对称的现象。所用的数据是来自于人口、健康与 HIV 指标调查。在用 Poisson 回归模型对协变量进行调整之后，我们发现在肯尼亚（2003 年患病率为 1.75，95%置信区间=1.33, 2.23）和莱索托（04 到 05 年，患病率为 1.39，95%置信区间=1.2, 1.62），女性感染 HIV 和患艾滋病的比例确实要高一些，但是在坦桑尼亚并没有出现这一情况。分解分析法展示出了这两种不同的模式。在坦桑尼亚，男女感染 HIV 病毒和患艾滋病比例的不同主要是由于男女所面对的 HIV 感染风险不同。与之相反，在肯尼亚和莱索托，这种不同一部分是由于所测量的风险因素的影响不同，包括社会人口学特征（年龄和婚姻状况）以及性行为（第一次性行为时间）。这些结果表明在肯尼亚和莱索托，即使男女接触 HIV 病毒的风险一样，这种男女感染 HIV 病毒和患艾滋病比例不对称的现象还是会存在的。不同国家产生男女患病率性别不平等的机制是不同的，在有些国家因为男女接触 HIV 病毒的风险不同，在另一些国家则是因为不同的风险因素的影响不同。这些不同的模式对我们制定政策来改善现状是有很大的指导意义的。
