# Supplementary material
Source: PubMed Central journal article supplement (PMC4186212)
Supplement: supp_czt075_czt075_French.pdf [file supp_czt075_czt075_French.pdf]

# Que cachent les inégalités hommes/femmes face au VIH/SIDA dans les pays sub-sahariens: spécifiquement au Kenya, Lesotho et Tanzanie

Accepté le 16 septembre 2013

En Afrique Sub-saharienne, les femmes ont beaucoup plus de risque d'être contaminées et de développer le virus de l'immunodéficience humaine (VIH)/Syndrome de l'immunodéficience acquise (Sida). Il est important de comprendre si les inégalités hommes/femmes face à la prévalence du VIH dans cette région peuvent être expliquées par des différences dans la distribution des facteurs de risque du VIH, par des différences dans les effets de ces facteurs de risque ou alors une combinaison des deux. Nous avons utilisé une extension de l'approche de décomposition de Blinder-Oaxaca pour expliquer les inégalités hommes/femmes au Kenya, au Lesotho et en Tanzanie en utilisant les données provenant d'études démographiques, d'études sur la santé et d'enquêtes sur les indicateurs du Sida. Après la prise en compte de co-variables en utilisant les modèles de régression de Poisson, les femmes ont été associées à une prévalence plus élevée du VIH/Sida au Kenya [taux de prévalence (TP) 1,73, (intervalle de confiance à 95 % (IC) 1,33, 2,23 en 2003] et au Lesotho (TP 1,39, 95% IC 1,20, 1,62 en 2004/05), mais pas en Tanzanie. Les analyses de décomposition montrent deux scénarios distincts dans le temps. En Tanzanie, l'inégalité des sexes face au VIH/Sida est expliquée par la différence de répartition des facteurs de risque du VIH entre les hommes et les femmes. En revanche, au Kenya et au Lesotho, cette inégalité est en partie expliquée par les effets de mesure des facteurs de risque du VIH/Sida chez les hommes et les femmes, incluant les caractéristiques sociodémographiques (âge et statut matrimonial) et les comportements sexuels (âge du premier rapport) ; les résultats tendent à montrer que les inégalités hommes/femmes face au VIH/Sida persisteront au Kenya et au Lesotho et ce même si hommes et femmes avaient la même répartition des facteurs de risque du VIH. Les inégalités hommes/femmes peuvent varier selon les pays, avec des inégalités attribuées à une répartition inégale des facteurs de risque chez les hommes et chez les femmes dans certains pays, et l'effet différentiel de ces facteurs entre groupes dans d'autres groupes. Ces différents scénarios sont de grande importance pour l'élaboration de politique pour réduire les inégalités des sexes face au VIH/Sida.

Mots clés : VIH, Syndrome de l'immunodéficience acquise, genre, inégalités, Afrique sub-saharienne
