# Supplementary material
Source: PubMed Central journal article supplement (PMC4186212)
Supplement: supp_czt075_czt075_Spanish.pdf [file supp_czt075_czt075_Spanish.pdf]

# **Qué hay detrás de las desigualdades de género en VIH/SIDA en los países del África sub-Sahariana: evidencias de Kenya, Lesotho y Tanzania**

**Drissa Sia, Yentema Onadja, Arijit Nandi, Anne Foro y Timothy Brewer**

**Aceptado** 16 de septiembre de 2013

En el África sub-Sahariana, las mujeres corren un riesgo desproporcionado de adquirir y tener el virus de inmunodeficiencia humana (VIH) / síndrome de inmunodeficiencia adquirida (SIDA). Es importante aclarar si las desigualdades de género en la prevalencia del VIH en esta región se explican por diferencias en la distribución de los factores de riesgo de VIH, diferencias en los efectos de estos factores de riesgo o una combinación de ambos. Se utilizó una extensión del enfoque de descomposición Blinder-Oaxaca para explicar las desigualdades de género en el VIH/SIDA en Kenya, Lesotho y Tanzania, usando los datos de las encuestas de indicadores demográficos, de salud y de SIDA. Después de ajustar por covariables utilizando modelos de regresión de Poisson, el sexo femenino se asoció con una mayor prevalencia de VIH/SIDA en Kenya [razón de prevalencia (RP) = 1,73, intervalo de confianza del 95% (IC) = 1,33, 2,33 en 2003] y Lesotho [PR = 1,39, IC 95% = 1,20, 1,62 en 2004/05), pero no en Tanzania. Los análisis de descomposición demostraron dos patrones distintos en el tiempo. En Tanzania, la desigualdad de género en el VIH/SIDA se explicó por las diferencias en la distribución de los factores de riesgo de VIH entre hombres y mujeres. En contraste, en Kenya y Lesotho, esta desigualdad se explicó en parte por las diferencias en

los efectos a través de hombres y mujeres de los factores medidos de riesgo de VIH/SIDA, incluyendo las características socio-demográficas (edad y estado civil) y comportamientos sexuales (edad de la primera relación sexual); estos resultados implican que las desigualdades de género en el VIH/SIDA podría persistir en Kenya y Lesotho aún si hombres y mujeres tuvieran distribuciones similares de los factores de riesgo de VIH. La producción de las desigualdades de género puede variar de un país a otro, con las desigualdades atribuibles a la distribución desigual de los factores de riesgo entre hombres y mujeres en algunos países y al efecto diferencial de estos factores entre los grupos en otros. Estos diferentes patrones tienen implicaciones importantes en las políticas para reducir las desigualdades de género en el VIH/SIDA.

**Palabras claves** VIH, síndrome de inmunodeficiencia adquirida, género, desigualdades, África sub-Sahariana

### **Mensajes claves**

- Existen desigualdades de género persistentes en materia de VIH/SIDA en el África sub-Sahariana.
- Las fuentes de las desigualdades de género en la infección por VIH/SIDA varía según los países, pero que no varían con el tiempo dentro de los países.
- En Tanzania las ‘diferencias en la distribución’ de los factores de riesgo del VIH entre hombres y mujeres han contribuido a las desigualdades.
- El ‘efecto diferencial’ de los factores de riesgo contribuye a las desigualdades en Kenya y Lesotho, lo que implica que las desigualdades de género en el VIH/SIDA podrían persistir en Kenya y Lesotho, incluso si

los hombres y las mujeres tuvieran distribuciones similares de los factores de riesgo de VIH.
